# Supplementary material for: The Plot Thickens: Haploid and Triploid-Like Thalli, Hybridization, and Biased Mating Type Ratios in Letharia
Source: Front Fungal Biol. 2021 May 26;2:656386. doi: 10.3389/ffunb.2021.656386 (PMC10512270; doi:10.3389/ffunb.2021.656386)
Supplement: Supplementary file 1 [file Data_Sheet_1.XLSX]

## Sheet: All
Country	Region	Locality name	Coordinates	Collector (s)	Repository	Sequence ID	Letharia ID and ITS haplotype	Comment	Idiomorph	ITS Genbank Accession	MAT Genbank Accession	SRA accession
Italy	Trentino-Alto Adige	Dolomites, Alpe di Siusi	46.52156°N, 11.701158 E	J. Nascimbene	UPS	It_001	L. vulpina CC1b		MAT1-2	N/A	N/A	N/A
Italy	Trentino-Alto Adige	Dolomites, Alpe di Siusi	46.52156°N, 11.701158 E	J. Nascimbene	UPS	It_002	L. vulpina CC1b		MAT1-1	N/A	N/A	N/A
Italy	Trentino-Alto Adige	Dolomites, Alpe di Siusi	46.52156°N, 11.701158 E	J. Nascimbene	UPS	It_003	L. vulpina PV1a		MAT1-2	MG645032	N/A	N/A
Italy	Trentino-Alto Adige	Dolomites, Alpe di Siusi	46.52156°N, 11.701158 E	J. Nascimbene	UPS	It_004	L. vulpina PV1a		MAT1-2	N/A	N/A	N/A
Italy	Trentino-Alto Adige	Dolomites, Alpe di Siusi	46.52156°N, 11.701158 E	J. Nascimbene	UPS	It_005	L. vulpina CC1b		MAT1-2	N/A	N/A	N/A
Italy	Trentino-Alto Adige	Dolomites, Alpe di Siusi	46.52156°N, 11.701158 E	J. Nascimbene	UPS	It_006	L . vulpina WN1, DA1, SY1	L. vulpina algal ITS	MAT1-1	MG645016	N/A	N/A
Italy	Trentino-Alto Adige	Dolomites, Alpe di Siusi	46.52156°N, 11.701158 E	J. Nascimbene	UPS	It_007	L. vulpina CC1b		MAT1-2	N/A	N/A	N/A
Italy	Trentino-Alto Adige	Dolomites, Alpe di Siusi	46.52156°N, 11.701158 E	J. Nascimbene	UPS	It_008	L. vulpina PV1a		MAT1-1	N/A	N/A	N/A
Italy	Trentino-Alto Adige	Dolomites, Alpe di Siusi	46.52156°N, 11.701158 E	J. Nascimbene	UPS	It_009	L. vulpina PV1a		MAT1-2	N/A	N/A	N/A
Italy	Trentino-Alto Adige	Dolomites, Alpe di Siusi	46.52156°N, 11.701158 E	J. Nascimbene	UPS	It_010	L. vulpina PV1a	fertile	both, excluded	N/A	N/A	N/A
Italy	Trentino-Alto Adige	Dolomites, Malga Fanes	46.593838° N, 12.02719°E	J. Nascimbene	UPS	It_011	L. vulpina CC1b		MAT1-2	N/A	N/A	N/A
Italy	Trentino-Alto Adige	Dolomites, Malga Fanes	46.593838° N, 12.02719°E	J. Nascimbene	UPS	It_012	L. vulpina PV1a		MAT1-2	N/A	N/A	N/A
Italy	Trentino-Alto Adige	Dolomites, Malga Fanes	46.593838° N, 12.02719°E	J. Nascimbene	UPS	It_013	L. vulpina CC1b		MAT1-2	N/A	N/A	N/A
Italy	Trentino-Alto Adige	Dolomites, Malga Fanes	46.593838° N, 12.02719°E	J. Nascimbene	UPS	It_014	L. vulpina PV1a		MAT1-2	N/A	N/A	N/A
Italy	Trentino-Alto Adige	Dolomites, Malga Fanes	46.593838° N, 12.02719°E	J. Nascimbene	UPS	It_015	L. vulpina PV1a		MAT1-2	N/A	N/A	N/A
Italy	Trentino-Alto Adige	Dolomites, Malga Fanes	46.593838° N, 12.02719°E	J. Nascimbene	UPS	It_016	L. lupina AB3b		MAT1-1	N/A	N/A	N/A
Italy	Trentino-Alto Adige	Dolomites, Malga Fanes	46.593838° N, 12.02719°E	J. Nascimbene	UPS	It_017	L. cf. vulpina unique ITS, European haplotype		MAT1-1	MG645035	N/A	N/A
Italy	Trentino-Alto Adige	Dolomites, Malga Fanes	46.593838° N, 12.02719°E	J. Nascimbene	UPS	It_018	L. vulpina PV1a		MAT1-2	N/A	N/A	N/A
Italy	Trentino-Alto Adige	Dolomites, Malga Fanes	46.593838° N, 12.02719°E	J. Nascimbene	UPS	It_019	L. vulpina PV1a		MAT1-2	N/A	N/A	N/A
Italy	Trentino-Alto Adige	Dolomites, Malga Fanes	46.593838° N, 12.02719°E	J. Nascimbene	UPS	It_020	L. vulpina CC1a		MAT1-2	N/A	N/A	N/A
Italy	Trentino-Alto Adige	Val Lunga, Malga Melago	46.826123° N, 10.673673°E	J. Nascimbene	UPS	It_021	L. lupina Ab11a		MAT1-2	N/A	N/A	N/A
Italy	Trentino-Alto Adige	Val Lunga, Malga Melago	46.826123° N, 10.673673°E	J. Nascimbene	UPS	It_022	L. lupina BH9		MAT1-2	N/A	N/A	N/A
Italy	Trentino-Alto Adige	Val Lunga, Malga Melago	46.826123° N, 10.673673°E	J. Nascimbene	UPS	It_023	L. vulpina CC1b		MAT1-2	N/A	N/A	N/A
Italy	Trentino-Alto Adige	Val Lunga, Malga Melago	46.826123° N, 10.673673°E	J. Nascimbene	UPS	It_024	L. lupina BH9		MAT1-2	N/A	N/A	N/A
Italy	Trentino-Alto Adige	Val Lunga, Malga Melago	46.826123° N, 10.673673°E	J. Nascimbene	UPS	It_025	L. lupina Ab11a		MAT1-2	N/A	N/A	N/A
Italy	Trentino-Alto Adige	Val Lunga, Malga Melago	46.826123° N, 10.673673°E	J. Nascimbene	UPS	It_026	L. lupina Ab11a		MAT1-2	N/A	N/A	N/A
Italy	Trentino-Alto Adige	Val Lunga, Malga Melago	46.826123° N, 10.673673°E	J. Nascimbene	UPS	It_027	L. vulpina CC1b		MAT1-1	N/A	N/A	N/A
Italy	Trentino-Alto Adige	Val Lunga, Malga Melago	46.826123° N, 10.673673°E	J. Nascimbene	UPS	It_028	L. lupina BH9		MAT1-2	N/A	N/A	N/A
Italy	Trentino-Alto Adige	Val Lunga, Malga Melago	46.826123° N, 10.673673°E	J. Nascimbene	UPS	It_029	L. lupina Ab11a		MAT1-2	N/A	N/A	N/A
Italy	Trentino-Alto Adige	Val Lunga, Malga Melago	46.826123° N, 10.673673°E	J. Nascimbene	UPS	It_030	L. vulpina PV1a		MAT1-2	N/A	N/A	N/A
Italy	Trentino-Alto Adige	Senales Valley, Maso Corto	46.740622° N, 10.79007°E	J. Nascimbene	UPS	It_031	L. vulpina PV1a		MAT1-2	N/A	N/A	N/A
Italy	Trentino-Alto Adige	Senales Valley, Maso Corto	46.740622° N, 10.79007°E	J. Nascimbene	UPS	It_032	L. vulpina PV1a		MAT1-2	N/A	N/A	N/A
Italy	Trentino-Alto Adige	Senales Valley, Maso Corto	46.740622° N, 10.79007°E	J. Nascimbene	UPS	It_033	L. vulpina PV1a		MAT1-2	N/A	N/A	N/A
Italy	Trentino-Alto Adige	Senales Valley, Maso Corto	46.740622° N, 10.79007°E	J. Nascimbene	UPS	It_034	L. vulpina CC1b		MAT1-2	N/A	N/A	N/A
Italy	Trentino-Alto Adige	Senales Valley, Maso Corto	46.740622° N, 10.79007°E	J. Nascimbene	UPS	It_035	L. lupina Ab11a		MAT1-2	N/A	N/A	N/A
Italy	Trentino-Alto Adige	Senales Valley, Maso Corto	46.740622° N, 10.79007°E	J. Nascimbene	UPS	It_036	L. vulpina PV1a		MAT1-2	N/A	N/A	N/A
Italy	Trentino-Alto Adige	Senales Valley, Maso Corto	46.740622° N, 10.79007°E	J. Nascimbene	UPS	It_037	L. vulpina PV1a		MAT1-2	N/A	N/A	N/A
Italy	Trentino-Alto Adige	Senales Valley, Maso Corto	46.740622° N, 10.79007°E	J. Nascimbene	UPS	It_038	L. vulpina CC1b		MAT1-2	N/A	N/A	N/A
Italy	Trentino-Alto Adige	Senales Valley, Maso Corto	46.740622° N, 10.79007°E	J. Nascimbene	UPS	It_039	L. vulpina CC1b		MAT1-2	N/A	N/A	N/A
Italy	Trentino-Alto Adige	Senales Valley, Maso Corto	46.740622° N, 10.79007°E	J. Nascimbene	UPS	It_040	L. vulpina PV1a		MAT1-2	N/A	N/A	N/A
Italy	Trentino-Alto Adige	Oberreggen, Zirmboden	46.383748° N, 11.550405°E	J. Nascimbene	UPS	It_041	L. vulpina PV1a		MAT1-2	N/A	N/A	N/A
Italy	Trentino-Alto Adige	Oberreggen, Zirmboden	46.383748° N, 11.550405°E	J. Nascimbene	UPS	It_042	L. vulpina PV1a		MAT1-2	N/A	N/A	N/A
Italy	Trentino-Alto Adige	Oberreggen, Zirmboden	46.383748° N, 11.550405°E	J. Nascimbene	UPS	It_043	L. vulpina PV1a		MAT1-2	N/A	N/A	N/A
Italy	Trentino-Alto Adige	Oberreggen, Zirmboden	46.383748° N, 11.550405°E	J. Nascimbene	UPS	It_044	L . vulpina WN1, DA1, SY1	L. vulpina algal ITS	MAT1-1	N/A	N/A	N/A
Italy	Trentino-Alto Adige	Oberreggen, Zirmboden	46.383748° N, 11.550405°E	J. Nascimbene	UPS	It_045	L. vulpina CC1b		MAT1-2	N/A	N/A	N/A
Italy	Trentino-Alto Adige	Oberreggen, Zirmboden	46.383748° N, 11.550405°E	J. Nascimbene	UPS	It_046	L. vulpina PV1a		MAT1-2	N/A	N/A	N/A
Italy	Trentino-Alto Adige	Oberreggen, Zirmboden	46.383748° N, 11.550405°E	J. Nascimbene	UPS	It_047	L. vulpina PV1a		MAT1-2	N/A	N/A	N/A
Italy	Trentino-Alto Adige	Oberreggen, Zirmboden	46.383748° N, 11.550405°E	J. Nascimbene	UPS	It_048	L. vulpina CC1b		MAT1-2	N/A	N/A	N/A
Italy	Trentino-Alto Adige	Oberreggen, Zirmboden	46.383748° N, 11.550405°E	J. Nascimbene	UPS	It_049	L. vulpina CC1b		MAT1-2	N/A	N/A	N/A
Italy	Trentino-Alto Adige	Oberreggen, Zirmboden	46.383748° N, 11.550405°E	J. Nascimbene	UPS	It_050	L. vulpina CC1b		MAT1-2	N/A	N/A	N/A
Italy	Trentino-Alto Adige	VaIle Rossa, secondary valley of Val Aurina	47.043403° N, 12.130411°E	J. Nascimbene	UPS	It_051	L. vulpina CC1b		MAT1-2	N/A	N/A	N/A
Italy	Trentino-Alto Adige	VaIle Rossa, secondary valley of Val Aurina	47.043403° N, 12.130411°E	J. Nascimbene	UPS	It_052	L. vulpina CC1b		MAT1-2	N/A	N/A	N/A
Italy	Trentino-Alto Adige	VaIle Rossa, secondary valley of Val Aurina	47.043403° N, 12.130411°E	J. Nascimbene	UPS	It_053	L. vulpina PV1a		MAT1-2	N/A	N/A	N/A
Italy	Trentino-Alto Adige	VaIle Rossa, secondary valley of Val Aurina	47.043403° N, 12.130411°E	J. Nascimbene	UPS	It_054	L. vulpina CC1b		MAT1-2	N/A	N/A	N/A
Italy	Trentino-Alto Adige	VaIle Rossa, secondary valley of Val Aurina	47.043403° N, 12.130411°E	J. Nascimbene	UPS	It_055	L. vulpina CC1b		MAT1-2	N/A	N/A	N/A
Italy	Trentino-Alto Adige	VaIle Rossa, secondary valley of Val Aurina	47.043403° N, 12.130411°E	J. Nascimbene	UPS	It_056	L. vulpina CC1b		MAT1-2	N/A	N/A	N/A
Italy	Trentino-Alto Adige	VaIle Rossa, secondary valley of Val Aurina	47.043403° N, 12.130411°E	J. Nascimbene	UPS	It_057	L. vulpina CC1b		MAT1-2	N/A	N/A	N/A
Italy	Trentino-Alto Adige	VaIle Rossa, secondary valley of Val Aurina	47.043403° N, 12.130411°E	J. Nascimbene	UPS	It_058	L. vulpina PV1a		MAT1-2	N/A	N/A	N/A
Italy	Trentino-Alto Adige	VaIle Rossa, secondary valley of Val Aurina	47.043403° N, 12.130411°E	J. Nascimbene	UPS	It_059	L. vulpina CC1a		MAT1-2	N/A	N/A	N/A
Italy	Trentino-Alto Adige	VaIle Rossa, secondary valley of Val Aurina	47.043403° N, 12.130411°E	J. Nascimbene	UPS	It_060	L. vulpina CC1b		MAT1-2	N/A	N/A	N/A
Canada	British Colombia	Cash Creek	N/A	Y. Yamamoto	APU	LTR/VU-2	L. lupina BS1a	mycobiont pure culture	MAT1-1	N/A	MK521630	PRJNA523679
USA	Montana	Jocko Prairie	47.20464°N, 113.90652°W	T. Spribille	UPS	MG_29	L. cf. rugosa, unique ITS	metagenome	MAT1-1	N/A	MK521632	SRP149293
USA	Montana	Siegel Creek	47.30980°N, 114.80423°W	T. Spribille	UPS	MG_42	L. vulpina CC1b	metagenome	MAT1-1	N/A	MK521631	SRP149293
USA	Montana	Owl loop road	47.40307°N, 113.64687°W	T. Spribille	UPS	MG_67	L. lupina AB2b	metagenome	both, excluded	N/A	N/A	SRP149293
USA	Montana	Maclay Flats	46.83540°N, 114.10364°W	T. Spribille	UPS	MG_80	L. cf. columbiana, unique ITS	metagenome	MAT1-2	N/A	MK521629	SRP149293
Sweden	Dalarna	Rättvik, Ore Kronopark	N 61° 8.1208', E 15° 23.0763'	V. Tuovinen & L. Bergström	UPS	Sw_001	L. vulpina CC1b		MAT1-2	N/A	N/A	N/A
Sweden	Dalarna	Rättvik, Ore Kronopark	N 61° 8.1208', E 15° 23.0763'	V. Tuovinen & L. Bergström	UPS	Sw_002	L. vulpina CC1b		MAT1-2	N/A	N/A	N/A
Sweden	Dalarna	Rättvik, Ore Kronopark	N 61° 8.1208', E 15° 23.0763'	V. Tuovinen & L. Bergström	UPS	Sw_003	L. vulpina CC1b		MAT1-2	N/A	N/A	N/A
Sweden	Dalarna	Rättvik, Ore Kronopark	N 61° 8.1208', E 15° 23.0763'	V. Tuovinen & L. Bergström	N/A	Sw_004	L. vulpina CC1b		MAT1-2	N/A	N/A	N/A
Sweden	Dalarna	Rättvik, Ore Kronopark	N 61° 8.1208', E 15° 23.0763'	V. Tuovinen & L. Bergström	N/A	Sw_005	L. vulpina CC1b		MAT1-2	N/A	N/A	N/A
Sweden	Dalarna	Rättvik, Ore Kronopark	N 61° 8.1208', E 15° 23.0763'	V. Tuovinen & L. Bergström	UPS	Sw_006	L. cf. vulpina unique ITS, European haplotype		MAT1-2	MG645036	N/A	N/A
Sweden	Dalarna	Rättvik, Ore Kronopark	N 61° 8.1208', E 15° 23.0763'	V. Tuovinen & L. Bergström	N/A	Sw_007	L. vulpina CC1b		MAT1-2	N/A	N/A	N/A
Sweden	Dalarna	Rättvik, Ore Kronopark	N 61° 8.1208', E 15° 23.0763'	V. Tuovinen & L. Bergström	N/A	Sw_008	L. cf. vulpina unique ITS, European haplotype		MAT1-2	N/A	N/A	N/A
Sweden	Dalarna	Rättvik, Ore Kronopark	N 61° 8.1208', E 15° 23.0763'	V. Tuovinen & L. Bergström	UPS	Sw_009	L. vulpina CC1b		MAT1-2	N/A	N/A	N/A
Sweden	Dalarna	Rättvik, Ore Kronopark	N 61° 8.1208', E 15° 23.0763'	V. Tuovinen & L. Bergström	UPS	Sw_010	L. vulpina CC1b		MAT1-2	N/A	N/A	N/A
Sweden	Dalarna	Rättvik, Ore Kronopark	N 61° 8.1208', E 15° 23.0763'	V. Tuovinen & L. Bergström	UPS	Sw_011	L. vulpina CC1b		MAT1-2	N/A	N/A	N/A
Sweden	Dalarna	Rättvik, Ore Kronopark	N 61° 8.1208', E 15° 23.0763'	V. Tuovinen & L. Bergström	UPS	Sw_012	L. vulpina CC1b		MAT1-2	N/A	N/A	N/A
Sweden	Dalarna	Rättvik, Ore Kronopark	N 61° 8.1208', E 15° 23.0763'	V. Tuovinen & L. Bergström	UPS	Sw_013	L. vulpina CC1b		MAT1-2	N/A	N/A	N/A
Sweden	Dalarna	Rättvik, Ore Kronopark	N 61° 8.1208', E 15° 23.0763'	V. Tuovinen & L. Bergström	UPS	Sw_014	L. cf. vulpina unique ITS, European haplotype		MAT1-2	N/A	N/A	N/A
Sweden	Dalarna	Rättvik, Ore Kronopark	N 61° 8.1208', E 15° 23.0763'	V. Tuovinen & L. Bergström	UPS	Sw_015	L. vulpina CC1b		MAT1-2	N/A	N/A	N/A
Sweden	Dalarna	Rättvik, Ore Kronopark	N 61° 8.1208', E 15° 23.0763'	V. Tuovinen & L. Bergström	UPS	Sw_016	L. vulpina CC1b		MAT1-2	N/A	N/A	N/A
Sweden	Dalarna	Rättvik, Ore Kronopark	N 61° 8.1208', E 15° 23.0763'	V. Tuovinen & L. Bergström	N/A	Sw_017	L. vulpina CC1b		MAT1-2	N/A	N/A	N/A
Sweden	Dalarna	Rättvik, Ore Kronopark	N 61° 8.1208', E 15° 23.0763'	V. Tuovinen & L. Bergström	N/A	Sw_018	L. vulpina CC1b		MAT1-2	N/A	N/A	N/A
Sweden	Dalarna	Rättvik, Ore Kronopark	N 61° 8.1208', E 15° 23.0763'	V. Tuovinen & L. Bergström	N/A	Sw_019	L. vulpina CC1b		MAT1-2	N/A	N/A	N/A
Sweden	Dalarna	Rättvik, Ore Kronopark	N 61° 8.1208', E 15° 23.0763'	V. Tuovinen & L. Bergström	N/A	Sw_020	L. vulpina CC1b		MAT1-2	N/A	N/A	N/A
Sweden	Dalarna	Falun, Stormyren	N 60° 55.7186', E 15° 48.0908'	V. Tuovinen & L. Bergström	UPS	Sw_021	L. vulpina CC1b		MAT1-2	N/A	N/A	N/A
Sweden	Dalarna	Falun, Stormyren	N 60° 55.7186', E 15° 48.0908'	V. Tuovinen & L. Bergström	UPS	Sw_022	L. vulpina CC1b		MAT1-2	N/A	N/A	N/A
Sweden	Dalarna	Falun, Stormyren	N 60° 55.7186', E 15° 48.0908'	V. Tuovinen & L. Bergström	UPS	Sw_023	L. vulpina CC1b		MAT1-2	N/A	N/A	N/A
Sweden	Dalarna	Falun, Stormyren	N 60° 55.7186', E 15° 48.0908'	V. Tuovinen & L. Bergström	UPS	Sw_024	L. vulpina CC1b		MAT1-2	N/A	N/A	N/A
Sweden	Dalarna	Falun, Stormyren	N 60° 55.7186', E 15° 48.0908'	V. Tuovinen & L. Bergström	UPS	Sw_025	L. vulpina CC1b		MAT1-2	N/A	N/A	N/A
Sweden	Dalarna	Falun, Stormyren	N 60° 55.7186', E 15° 48.0908'	V. Tuovinen & L. Bergström	UPS	Sw_026	L. vulpina CC1b		MAT1-2	N/A	N/A	N/A
Sweden	Dalarna	Falun, Stormyren	N 60° 55.7186', E 15° 48.0908'	V. Tuovinen & L. Bergström	UPS	Sw_027	L. vulpina CC1b		MAT1-2	N/A	N/A	N/A
Sweden	Dalarna	Falun, Stormyren	N 60° 55.7186', E 15° 48.0908'	V. Tuovinen & L. Bergström	N/A	Sw_028	L. vulpina CC1b		MAT1-2	N/A	N/A	N/A
Sweden	Dalarna	Falun, Stormyren	N 60° 55.7186', E 15° 48.0908'	V. Tuovinen & L. Bergström	N/A	Sw_029	L. vulpina CC1b		MAT1-2	N/A	N/A	N/A
Sweden	Dalarna	Falun, Stormyren	N 60° 55.7186', E 15° 48.0908'	V. Tuovinen & L. Bergström	UPS	Sw_030	L. vulpina CC1b		MAT1-2	N/A	N/A	N/A
Sweden	Dalarna	Falun, Stormyren	N 60° 55.7186', E 15° 48.0908'	V. Tuovinen & L. Bergström	N/A	Sw_031	L. vulpina CC1b		MAT1-2	N/A	N/A	N/A
Sweden	Dalarna	Falun, Stormyren	N 60° 55.7186', E 15° 48.0908'	V. Tuovinen & L. Bergström	UPS	Sw_032	L. vulpina CC1b		MAT1-2	N/A	N/A	N/A
Sweden	Dalarna	Falun, Stormyren	N 60° 55.7186', E 15° 48.0908'	V. Tuovinen & L. Bergström	UPS	Sw_033	L. vulpina CC1b		MAT1-2	N/A	N/A	N/A
Sweden	Dalarna	Falun, Stormyren	N 60° 55.7186', E 15° 48.0908'	V. Tuovinen & L. Bergström	UPS	Sw_034	L. vulpina CC1b		MAT1-2	N/A	N/A	N/A
Sweden	Dalarna	Falun, Stormyren	N 60° 55.7186', E 15° 48.0908'	V. Tuovinen & L. Bergström	N/A	Sw_035	L. vulpina CC1b		MAT1-2	N/A	N/A	N/A
Sweden	Dalarna	Falun, Stormyren	N 60° 55.7186', E 15° 48.0908'	V. Tuovinen & L. Bergström	UPS	Sw_036	L. vulpina CC1b		MAT1-2	N/A	N/A	N/A
Sweden	Dalarna	Falun, Stormyren	N 60° 55.7186', E 15° 48.0908'	V. Tuovinen & L. Bergström	N/A	Sw_037	L. vulpina CC1b		MAT1-2	N/A	N/A	N/A
Sweden	Dalarna	Falun, Stormyren	N 60° 55.7186', E 15° 48.0908'	V. Tuovinen & L. Bergström	UPS	Sw_038	L. vulpina CC1b		MAT1-2	N/A	N/A	N/A
Sweden	Dalarna	Falun, Stormyren	N 60° 55.7186', E 15° 48.0908'	V. Tuovinen & L. Bergström	UPS	Sw_039	L. vulpina CC1b		MAT1-2	N/A	N/A	N/A
Sweden	Dalarna	Falun, Stormyren	N 60° 55.7186', E 15° 48.0908'	V. Tuovinen & L. Bergström	N/A	Sw_040	L. vulpina CC1b		MAT1-2	N/A	N/A	N/A
Sweden	Dalarna	Falun, Stormyren	N 60° 55.7186', E 15° 48.0908'	V. Tuovinen & L. Bergström	UPS	Sw_041	L. vulpina CC1b		MAT1-2	N/A	N/A	N/A
Sweden	Dalarna	Älvsand, Klutsjön	N 62° 5.4126', E 12° 48.6073'	L. Bergström	UPS	Sw_042	L. vulpina CC1b		MAT1-2	N/A	N/A	N/A
Sweden	Dalarna	Älvsand, Klutsjön	N 62° 5.4126', E 12° 48.6073'	L. Bergström	N/A	Sw_043	L. vulpina CC1b		MAT1-2	N/A	N/A	N/A
Sweden	Dalarna	Älvsand, Klutsjön	N 62° 5.4126', E 12° 48.6073'	L. Bergström	UPS	Sw_044	L. vulpina CC1b		MAT1-2	N/A	N/A	N/A
Sweden	Dalarna	Älvsand, Klutsjön	N 62° 5.4126', E 12° 48.6073'	L. Bergström	N/A	Sw_045	L. vulpina CC1b		MAT1-2	N/A	N/A	N/A
Sweden	Dalarna	Älvsand, Klutsjön	N 62° 5.4126', E 12° 48.6073'	L. Bergström	UPS	Sw_046	L. vulpina CC1b		MAT1-2	N/A	N/A	N/A
Sweden	Dalarna	Älvsand, Klutsjön	N 62° 5.4126', E 12° 48.6073'	L. Bergström	UPS	Sw_047	L. cf. vulpina unique ITS, European haplotype		MAT1-2	N/A	N/A	N/A
Sweden	Dalarna	Älvsand, Klutsjön	N 62° 5.4126', E 12° 48.6073'	L. Bergström	UPS	Sw_048	L. vulpina CC1b		MAT1-2	N/A	N/A	N/A
Sweden	Dalarna	Älvsand, Klutsjön	N 62° 5.4126', E 12° 48.6073'	L. Bergström	UPS	Sw_049	L. cf. vulpina unique ITS, European haplotype		MAT1-2	N/A	N/A	N/A
Sweden	Dalarna	Älvsand, Klutsjön	N 62° 5.4126', E 12° 48.6073'	L. Bergström	UPS	Sw_050	L. vulpina CC1b		MAT1-2	N/A	N/A	N/A
Sweden	Dalarna	Älvsand, Klutsjön	N 62° 5.4126', E 12° 48.6073'	L. Bergström	UPS	Sw_051	L. vulpina CC1b		MAT1-2	N/A	N/A	N/A
Sweden	Dalarna	Älvsand, Klutsjön	N 62° 5.4126', E 12° 48.6073'	L. Bergström	UPS	Sw_052	L. vulpina CC1b		MAT1-2	N/A	N/A	N/A
Sweden	Dalarna	Älvsand, Klutsjön	N 62° 5.4126', E 12° 48.6073'	L. Bergström	N/A	Sw_053	L. cf. vulpina unique ITS, European haplotype		MAT1-2	N/A	N/A	N/A
Sweden	Dalarna	Älvsand, Klutsjön	N 62° 5.4126', E 12° 48.6073'	L. Bergström	N/A	Sw_054	L. vulpina CC1b		MAT1-2	N/A	N/A	N/A
Sweden	Dalarna	Älvsand, Klutsjön	N 62° 5.4126', E 12° 48.6073'	L. Bergström	UPS	Sw_055	L. cf. vulpina unique ITS, European haplotype		MAT1-2	N/A	N/A	N/A
Sweden	Dalarna	Älvsand, Klutsjön	N 62° 5.4126', E 12° 48.6073'	L. Bergström	N/A	Sw_056	L. vulpina CC1b		MAT1-2	N/A	N/A	N/A
Sweden	Dalarna	Älvsand, Klutsjön	N 62° 5.4126', E 12° 48.6073'	L. Bergström	N/A	Sw_057	L. vulpina CC1b		MAT1-2	N/A	N/A	N/A
Sweden	Dalarna	Älvsand, Klutsjön	N 62° 5.4126', E 12° 48.6073'	L. Bergström	UPS	Sw_058	L. vulpina CC1b		MAT1-2	N/A	N/A	N/A
Sweden	Dalarna	Älvsand, Klutsjön	N 62° 5.4126', E 12° 48.6073'	L. Bergström	UPS	Sw_059	L. vulpina CC1b		MAT1-2	N/A	N/A	N/A
Sweden	Dalarna	Älvsand, Klutsjön	N 62° 5.4126', E 12° 48.6073'	L. Bergström	N/A	Sw_060	L. vulpina CC1b		MAT1-2	N/A	N/A	N/A
Sweden	Dalarna	Älvsand, Klutsjön	N 62° 5.4126', E 12° 48.6073'	L. Bergström	UPS	Sw_061	L. vulpina CC1b		MAT1-2	N/A	N/A	N/A
Sweden	Dalarna	Älvsand, Grundöjan	N 62° 4.9271', E 12° 44.7169'	L. Bergström	N/A	Sw_062	L. cf. vulpina unique ITS, European haplotype		MAT1-2	N/A	N/A	N/A
Sweden	Dalarna	Älvsand, Grundöjan	N 62° 4.9271', E 12° 44.7169'	L. Bergström	UPS	Sw_063	L. vulpina CC1b		MAT1-2	N/A	N/A	N/A
Sweden	Dalarna	Älvsand, Grundöjan	N 62° 4.9271', E 12° 44.7169'	L. Bergström	UPS	Sw_064	L. vulpina CC1b		MAT1-2	N/A	N/A	N/A
Sweden	Dalarna	Älvsand, Grundöjan	N 62° 4.9271', E 12° 44.7169'	L. Bergström	UPS	Sw_065	L. vulpina CC1b		MAT1-2	N/A	N/A	N/A
Sweden	Dalarna	Älvsand, Grundöjan	N 62° 4.9271', E 12° 44.7169'	L. Bergström	UPS	Sw_066	L. vulpina CC1b		MAT1-2	N/A	N/A	N/A
Sweden	Dalarna	Älvsand, Grundöjan	N 62° 4.9271', E 12° 44.7169'	L. Bergström	UPS	Sw_067	L. vulpina CC1b		MAT1-2	N/A	N/A	N/A
Sweden	Dalarna	Älvsand, Grundöjan	N 62° 4.9271', E 12° 44.7169'	L. Bergström	N/A	Sw_068	L. vulpina CC1b		MAT1-2	N/A	N/A	N/A
Sweden	Dalarna	Älvsand, Grundöjan	N 62° 4.9271', E 12° 44.7169'	L. Bergström	N/A	Sw_069	L. vulpina CC1b		MAT1-2	N/A	N/A	N/A
Sweden	Dalarna	Älvsand, Grundöjan	N 62° 4.9271', E 12° 44.7169'	L. Bergström	UPS	Sw_070	L. vulpina CC1b		MAT1-2	N/A	N/A	N/A
Sweden	Dalarna	Älvsand, Grundöjan	N 62° 4.9271', E 12° 44.7169'	L. Bergström	UPS	Sw_071	L. vulpina CC1b		MAT1-2	N/A	N/A	N/A
Sweden	Dalarna	Älvsand, Grundöjan	N 62° 4.9271', E 12° 44.7169'	L. Bergström	UPS	Sw_072	L. vulpina CC1b		MAT1-2	N/A	N/A	N/A
Sweden	Dalarna	Älvsand, Grundöjan	N 62° 4.9271', E 12° 44.7169'	L. Bergström	UPS	Sw_073	L. vulpina CC1b		MAT1-2	N/A	N/A	N/A
Sweden	Dalarna	Älvsand, Grundöjan	N 62° 4.9271', E 12° 44.7169'	L. Bergström	N/A	Sw_074	L. vulpina CC1b		MAT1-2	N/A	N/A	N/A
Sweden	Dalarna	Älvsand, Grundöjan	N 62° 4.9271', E 12° 44.7169'	L. Bergström	N/A	Sw_075	L. vulpina CC1b		MAT1-2	N/A	N/A	N/A
Sweden	Dalarna	Älvsand, Grundöjan	N 62° 4.9271', E 12° 44.7169'	L. Bergström	UPS	Sw_076	L. vulpina CC1b		MAT1-2	N/A	N/A	N/A
Sweden	Dalarna	Älvsand, Grundöjan	N 62° 4.9271', E 12° 44.7169'	L. Bergström	N/A	Sw_077	L. vulpina CC1b		MAT1-2	N/A	N/A	N/A
Sweden	Dalarna	Älvsand, Grundöjan	N 62° 4.9271', E 12° 44.7169'	L. Bergström	UPS	Sw_078	L. vulpina CC1b		MAT1-2	N/A	N/A	N/A
Sweden	Dalarna	Älvsand, Grundöjan	N 62° 4.9271', E 12° 44.7169'	L. Bergström	UPS	Sw_079	L. vulpina CC1b		MAT1-2	N/A	N/A	N/A
Sweden	Dalarna	Älvsand, Grundöjan	N 62° 4.9271', E 12° 44.7169'	L. Bergström	UPS	Sw_080	L. vulpina CC1b		MAT1-2	N/A	N/A	N/A
Sweden	Dalarna	Älvsand, Grundöjan	N 62° 4.9271', E 12° 44.7169'	L. Bergström	UPS	Sw_081	L. vulpina CC1b		MAT1-2	N/A	N/A	N/A
Sweden	Dalarna	Leksand, Yxenmyr	N 60° 44.4517', E 14° 35.6933'	L. Bergström	UPS	Sw_082	L. vulpina CC1b		MAT1-2	N/A	N/A	N/A
Sweden	Dalarna	Leksand, Yxenmyr	N 60° 44.4517', E 14° 35.6933'	L. Bergström	UPS	Sw_083	L. vulpina CC1b		MAT1-2	N/A	N/A	N/A
Sweden	Dalarna	Leksand, Yxenmyr	N 60° 44.4517', E 14° 35.6933'	L. Bergström	N/A	Sw_084	L. vulpina CC1b		MAT1-2	N/A	N/A	N/A
Sweden	Dalarna	Leksand, Yxenmyr	N 60° 44.4517', E 14° 35.6933'	L. Bergström	UPS	Sw_085	L. vulpina CC1b		MAT1-2	N/A	N/A	N/A
Sweden	Dalarna	Leksand, Yxenmyr	N 60° 44.4517', E 14° 35.6933'	L. Bergström	UPS	Sw_086	L. vulpina CC1b		MAT1-2	N/A	N/A	N/A
Sweden	Dalarna	Leksand, Yxenmyr	N 60° 44.4517', E 14° 35.6933'	L. Bergström	UPS	Sw_087	L. vulpina CC1b		MAT1-2	N/A	N/A	N/A
Sweden	Dalarna	Leksand, Yxenmyr	N 60° 44.4517', E 14° 35.6933'	L. Bergström	N/A	Sw_088	L. vulpina CC1b		MAT1-2	N/A	N/A	N/A
Sweden	Dalarna	Leksand, Yxenmyr	N 60° 44.4517', E 14° 35.6933'	L. Bergström	UPS	Sw_089	L. vulpina CC1b		MAT1-2	N/A	N/A	N/A
Sweden	Dalarna	Leksand, Yxenmyr	N 60° 44.4517', E 14° 35.6933'	L. Bergström	UPS	Sw_090	L. vulpina CC1b		MAT1-2	N/A	N/A	N/A
Sweden	Dalarna	Leksand, Yxenmyr	N 60° 44.4517', E 14° 35.6933'	L. Bergström	N/A	Sw_091	L. vulpina CC1b		MAT1-2	N/A	N/A	N/A
Sweden	Dalarna	Leksand, Yxenmyr	N 60° 44.4517', E 14° 35.6933'	L. Bergström	N/A	Sw_092	L. vulpina CC1b		MAT1-2	N/A	N/A	N/A
Sweden	Dalarna	Leksand, Yxenmyr	N 60° 44.4517', E 14° 35.6933'	L. Bergström	UPS	Sw_093	L. vulpina CC1b		MAT1-2	N/A	N/A	N/A
Sweden	Dalarna	Leksand, Yxenmyr	N 60° 44.4517', E 14° 35.6933'	L. Bergström	N/A	Sw_094	L. vulpina CC1b		MAT1-2	N/A	N/A	N/A
Sweden	Dalarna	Leksand, Yxenmyr	N 60° 44.4517', E 14° 35.6933'	L. Bergström	N/A	Sw_095	L. vulpina CC1b		MAT1-2	N/A	N/A	N/A
Sweden	Dalarna	Älvdalen, Klingsten	N 61° 54.8594', E 12° 40.4947'	L. Bergström	UPS	Sw_096	L. vulpina CC1b		MAT1-2	N/A	N/A	N/A
Sweden	Dalarna	Älvdalen, Grundöjan Söder	N 62° 3.6679', E 12° 44.4887'	L. Bergström	UPS	Sw_097	L. vulpina CC1b		MAT1-2	N/A	N/A	N/A
Sweden	Dalarna	Älvdalen, Grundöjan Söder	N 62° 3.6679', E 12° 44.4887'	L. Bergström	N/A	Sw_098	L. vulpina CC1b		MAT1-2	N/A	N/A	N/A
Switzerland	Valais	Evolène, Arolla	46° 0' 6.00" N, 7° 28' 59.99" E	H. Johannesson	UPS	Sz_001	L. vulpina CC1b		MAT1-2	N/A	N/A	N/A
Switzerland	Valais	Evolène, Arolla	46° 0' 6.00" N, 7° 28' 59.99" E	H. Johannesson	UPS	Sz_002	L. vulpina CC1b		MAT1-2	N/A	N/A	N/A
Switzerland	Valais	Evolène, Arolla	46° 0' 6.00" N, 7° 28' 59.99" E	H. Johannesson	UPS	Sz_003	L. lupina BH9		MAT1-2	N/A	N/A	N/A
Switzerland	Valais	Evolène, Arolla	46° 0' 6.00" N, 7° 28' 59.99" E	H. Johannesson	UPS	Sz_004	L. vulpina CC1b		MAT1-2	N/A	N/A	N/A
Switzerland	Valais	Evolène, Arolla	46° 0' 6.00" N, 7° 28' 59.99" E	H. Johannesson	UPS	Sz_005	L. lupina BH9		both, excluded	N/A	N/A	N/A
Switzerland	Valais	Evolène, Arolla	46° 0' 6.00" N, 7° 28' 59.99" E	H. Johannesson	UPS	Sz_006	L. vulpina CC1b		MAT1-2	N/A	N/A	N/A
Switzerland	Valais	Evolène, Arolla	46° 0' 6.00" N, 7° 28' 59.99" E	H. Johannesson	UPS	Sz_007	L. vulpina CC1b		MAT1-2	N/A	N/A	N/A
Switzerland	Valais	Evolène, Arolla	46° 0' 6.00" N, 7° 28' 59.99" E	H. Johannesson	UPS	Sz_008	L. lupina Ab11a		MAT1-2	N/A	N/A	N/A
Switzerland	Valais	Evolène, Arolla	46° 0' 6.00" N, 7° 28' 59.99" E	H. Johannesson	UPS	Sz_009	L. vulpina CC1b		MAT1-2	N/A	N/A	N/A
Switzerland	Valais	Evolène, Arolla	46° 0' 6.00" N, 7° 28' 59.99" E	H. Johannesson	UPS	Sz_010	L. lupina AB3b		MAT1-1	N/A	N/A	N/A
Switzerland	Valais	Evolène, Arolla	46° 0' 6.00" N, 7° 28' 59.99" E	H. Johannesson	UPS	Sz_011	L. lupina Ab11a		MAT1-2	N/A	N/A	N/A
Switzerland	Valais	Evolène, Arolla	46° 0' 6.00" N, 7° 28' 59.99" E	H. Johannesson	UPS	Sz_012	L. lupina AB3b		MAT1-1	N/A	N/A	N/A
Switzerland	Valais	Evolène, Arolla	46° 0' 6.00" N, 7° 28' 59.99" E	H. Johannesson	UPS	Sz_013	L. lupina AB3b		MAT1-1	N/A	N/A	N/A
Switzerland	Valais	Evolène, Arolla	46° 0' 6.00" N, 7° 28' 59.99" E	H. Johannesson	UPS	Sz_014	L. lupina Ab11a		MAT1-2	N/A	N/A	N/A
Switzerland	Valais	Evolène, Arolla	46° 0' 6.00" N, 7° 28' 59.99" E	H. Johannesson	UPS	Sz_016	L. vulpina CC1b		MAT1-2	N/A	N/A	N/A
Switzerland	Valais	Evolène, Arolla	46° 0' 6.00" N, 7° 28' 59.99" E	H. Johannesson	UPS	Sz_017	L. lupina AB3b		MAT1-1	N/A	N/A	N/A
Switzerland	Valais	Evolène, Arolla	46° 0' 6.00" N, 7° 28' 59.99" E	H. Johannesson	UPS	Sz_018	L. vulpina Pv1a		MAT1-2	N/A	N/A	N/A
Switzerland	Valais	Evolène, Arolla	46° 0' 6.00" N, 7° 28' 59.99" E	H. Johannesson	UPS	Sz_019	L. vulpina CC1b		MAT1-2	N/A	N/A	N/A
Switzerland	Valais	Evolène, Arolla	46° 0' 6.00" N, 7° 28' 59.99" E	H. Johannesson	UPS	Sz_020	L. lupina AB3b		MAT1-1	N/A	N/A	N/A
USA	Montana	Maclay Flats	46.83540°N, 114.10364°W	T. Spribille	UPS	U_001	L. lupina AB5a		MAT1-2	MG645023	N/A	N/A
USA	Montana	Maclay Flats	46.83540°N, 114.10364°W	T. Spribille	UPS	U_002	L. cf. columbiana, unique ITS		MAT1-2	MG645037	N/A	N/A
USA	Montana	Maclay Flats	46.83540°N, 114.10364°W	T. Spribille	UPS	U_003	L. lupina BH12		MAT1-1	MG645024	N/A	N/A
USA	Montana	Maclay Flats	46.83540°N, 114.10364°W	T. Spribille	UPS	U_004	L. Lupina BH1		MAT1-1	MG645018	N/A	N/A
USA	Montana	Maclay Flats	46.83540°N, 114.10364°W	T. Spribille	UPS	U_005	L. lupina AB3b		MAT1-1	MG645025	N/A	N/A
USA	Montana	Maclay Flats	46.83540°N, 114.10364°W	T. Spribille	UPS	U_006	L. lupina AB5a		MAT1-2	N/A	N/A	N/A
USA	Montana	Maclay Flats	46.83540°N, 114.10364°W	T. Spribille	UPS	U_007	L. lupina AB5a		MAT1-2	N/A	N/A	N/A
USA	Montana	Maclay Flats	46.83540°N, 114.10364°W	T. Spribille	UPS	U_008	L. lupina AB3b	fertile	MAT1-2	N/A	N/A	N/A
USA	Montana	Maclay Flats	46.83540°N, 114.10364°W	T. Spribille	UPS	U_009	L. Lupina BH1		MAT1-2	N/A	N/A	N/A
USA	Montana	Maclay Flats	46.83540°N, 114.10364°W	T. Spribille	UPS	U_010	L. lupina AB2b		MAT1-2	MG645019	N/A	N/A
USA	Montana	Maclay Flats	46.83540°N, 114.10364°W	T. Spribille	UPS	U_011	L. lupina TP3b		MAT1-1	MG645020	N/A	N/A
USA	Montana	Maclay Flats	46.83540°N, 114.10364°W	T. Spribille	UPS	U_012	L. lupina BH9		MAT1-2	MG645026	N/A	N/A
USA	Montana	Maclay Flats	46.83540°N, 114.10364°W	T. Spribille	UPS	U_013	L. lupina AB2b		MAT1-1	N/A	N/A	N/A
USA	Montana	Maclay Flats	46.83540°N, 114.10364°W	T. Spribille	UPS	U_014	L. lupina Ab11a		MAT1-2	MG645021	N/A	N/A
USA	Montana	Maclay Flats	46.83540°N, 114.10364°W	T. Spribille	UPS	U_015	L. Lupina BH1		MAT1-2	N/A	N/A	N/A
USA	Montana	Maclay Flats	46.83540°N, 114.10364°W	T. Spribille	UPS	U_016	L. lupina BH9	fertile	MAT1-1	N/A	N/A	N/A
USA	Montana	Maclay Flats	46.83540°N, 114.10364°W	T. Spribille	UPS	U_017	L. lucida DP2		MAT1-2	N/A	N/A	N/A
USA	Montana	Maclay Flats	46.83540°N, 114.10364°W	T. Spribille	UPS	U_018	L. lucida DP2		MAT1-2	N/A	N/A	N/A
USA	Montana	Siegel Creek	47.30980°N, 114.80423°W	T. Spribille	UPS	U_019	L. vulpina FP1a		MAT1-1	MG645033	N/A	N/A
USA	Montana	Siegel Creek	47.30980°N, 114.80423°W	T. Spribille	UPS	U_020	L. lupina BH1		MAT1-2	N/A	N/A	N/A
USA	Montana	Siegel Creek	47.30980°N, 114.80423°W	T. Spribille	UPS	U_021	L. lupina AB3b		MAT1-1	N/A	N/A	N/A
USA	Montana	Siegel Creek	47.30980°N, 114.80423°W	T. Spribille	UPS	U_022	L. Lupina BH1	fertile	MAT1-2	N/A	N/A	N/A
USA	Montana	Finlay Creek	47.097074° N, 114.029301°W	T. Spribille	UPS	U_023	L. cf. columbiana, unique ITS		MAT1-2	MG645038	N/A	N/A
USA	Montana	Siegel Creek	47.30980°N, 114.80423°W	T. Spribille	UPS	U_024	L. vulpina PV1a		MAT1-2	N/A	N/A	N/A
USA	Montana	Cliffs N of Siegel Cr confluence on Clark Fork	47.31637°N, 114.80592°W	T. Spribille	UPS	U_025	L. cf. barbata LP1	short ITS sequence	MAT1-2	MG645039	N/A	N/A
USA	Montana	Cliffs N of Siegel Cr confluence on Clark Fork	47.31637°N, 114.80592°W	T. Spribille	UPS	U_026	L. vulpina FP1a		MAT1-2	N/A	N/A	N/A
USA	Montana	Siegel Creek	47.30980°N, 114.80423°W	T. Spribille	UPS	U_027	L. lupina AB5a		MAT1-1	N/A	N/A	N/A
USA	Montana	Siegel Creek	47.30980°N, 114.80423°W	T. Spribille	UPS	U_028	L. lupina BH12		MAT1-2	N/A	N/A	N/A
USA	Montana	Siegel Creek mid	47.30980°N, 114.80423°W	T. Spribille	UPS	U_029	L. Lupina BH1		MAT1-1	N/A	N/A	N/A
USA	Montana	Pattee Cr, Crazy Canyon	46.825391° N, 114.10364°W	T. Spribille	UPS	U_030	L. lupina AB3b		MAT1-1	N/A	N/A	N/A
USA	Montana	Saddle Mtn	47.15722°N, 114.14395°W	T. Spribille	UPS	U_031	L. lucida DP2		MAT1-2	N/A	N/A	N/A
USA	Montana	Saddle Mtn	47.15722°N, 114.14395°W	T. Spribille	UPS	U_032	L. lupina AB3b		MAT1-2	N/A	N/A	N/A
USA	Montana	Saddle Mtn	47.15722°N, 114.14395°W	T. Spribille	UPS	U_033	L. lupina AB2b		MAT1-1	N/A	N/A	N/A
USA	Montana	Saddle Mtn	47.15722°N, 114.14395°W	T. Spribille	UPS	U_034	L. lupina BH12		MAT1-1	N/A	N/A	N/A
USA	Montana	Saddle Mtn	47.15722°N, 114.14395°W	T. Spribille	UPS	U_035	L. lupina AB3b		MAT1-1	N/A	N/A	N/A
USA	Montana	Saddle Mtn	47.15722°N, 114.14395°W	T. Spribille	UPS	U_036	L. lupina AB3b		MAT1-1	N/A	N/A	N/A
USA	Montana	Saddle Mtn	47.15722°N, 114.14395°W	T. Spribille	UPS	U_037	L. lucida DP2		MAT1-1	N/A	N/A	N/A
USA	Montana	Saddle Mtn	47.15722°N, 114.14395°W	T. Spribille	UPS	U_038	L. lupina AB3b		MAT1-1	N/A	N/A	N/A
USA	Montana	Saddle Mtn	47.15722°N, 114.14395°W	T. Spribille	UPS	U_039	L. cf. columbiana, unique ITS		MAT1-2	MG645040	N/A	N/A
USA	Montana	Saddle Mtn	47.15722°N, 114.14395°W	T. Spribille	UPS	U_040	L. lupina AB3b		MAT1-2	N/A	N/A	N/A
USA	Montana	Saddle Mtn	47.15722°N, 114.14395°W	T. Spribille	UPS	U_041	L. columbiana s.l.	no ITS sequence	MAT1-1	N/A	N/A	N/A
USA	Montana	Saddle Mtn	47.15722°N, 114.14395°W	T. Spribille	UPS	U_042	L. cf. lupina, unique ITS	fertile	MAT1-1	MG645041	N/A	N/A
USA	Montana	Hwy 28 at Cottonwood Creek Rd	47.54735°N, 114.68165°W	T. Spribille	UPS	U_045	L. lupina AB5a		MAT1-1	N/A	N/A	N/A
USA	Montana	Hwy 28 at Cottonwood Creek Rd	47.54735°N, 114.68165°W	T. Spribille	UPS	U_046	L. rugosa CL1		MAT1-2	MG645030	N/A	N/A
USA	Montana	Siegel Creek	47.30980°N, 114.80423°W	T. Spribille	UPS	U_047	L. lupina BH12		MAT1-1	N/A	N/A	N/A
USA	Montana	Siegel Creek	47.30980°N, 114.80423°W	T. Spribille	UPS	U_048	L. vulpina FP1a		MAT1-1	N/A	N/A	N/A
USA	Montana	Siegel Creek	47.30980°N, 114.80423°W	T. Spribille	UPS	U_049	L. vulpina MD2a		MAT1-2	MG645031	N/A	N/A
USA	Montana	Clark Fork River opposite Paradise	47.38745°N, 114.81197°W	T. Spribille	UPS	U_050	L. vulpina FP1a		MAT1-2	N/A	N/A	N/A
USA	Montana	Maclay Flats	46.83540°N, 114.10364°W	T. Spribille	UPS	U_051	L. cf. columbiana, unique ITS		MAT1-2	N/A	N/A	N/A
USA	Montana	Tim Wheeler property on Jocko River	47.180608° N, 113.950967°W	T. Spribille	UPS	U_052	L. lupina AB3b		MAT1-1	N/A	N/A	N/A
USA	Montana	Rainbow lake	47.52831°N, 114.74980°W	T. Spribille	UPS	U_053	L. lupina AB3b		MAT1-2	N/A	N/A	N/A
USA	Montana	Rainbow lake	47.52831°N, 114.74980°W	T. Spribille	UPS	U_054	L. lupina AB3b		MAT1-2	N/A	N/A	N/A
USA	Montana	Hwy 28 at Cottonwood Creek Rd	47.54735°N, 114.68165°W	T. Spribille	UPS	U_055	L. lupina AB2b		MAT1-1	N/A	N/A	N/A
USA	Montana	Hwy 28 at Cottonwood Creek Rd	47.54735°N, 114.68165°W	T. Spribille	UPS	U_056	L. cf. lupina, unique ITS		MAT1-2	N/A	N/A	N/A
USA	Montana	Hwy 28 at Cottonwood Creek Rd	47.54735°N, 114.68165°W	T. Spribille	UPS	U_057	L. lupina AB2b		MAT1-1	N/A	N/A	N/A
USA	Montana	Hwy 28 at Cottonwood Creek Rd	47.54735°N, 114.68165°W	T. Spribille	UPS	U_058	L. lupina AB2b		MAT1-1	N/A	N/A	N/A
USA	Montana	Hwy 28 at Cottonwood Creek Rd	47.54735°N, 114.68165°W	T. Spribille	UPS	U_059	L. lupina AB5a		MAT1-1	N/A	N/A	N/A
USA	Montana	Hwy 28 at Cottonwood Creek Rd	47.54735°N, 114.68165°W	T. Spribille	UPS	U_060	L. lupina BH9		MAT1-2	N/A	N/A	N/A
USA	Montana	Hwy 28 at Cottonwood Creek Rd	47.54735°N, 114.68165°W	T. Spribille	UPS	U_061	L. lupina AB3b		MAT1-1	N/A	N/A	N/A
USA	Montana	Hwy 28 at Cottonwood Creek Rd	47.54735°N, 114.68165°W	T. Spribille	UPS	U_062	L. lupina AB3b		MAT1-2	N/A	N/A	N/A
USA	Montana	Hwy 28 at Cottonwood Creek Rd	47.54735°N, 114.68165°W	T. Spribille	UPS	U_063	L. lupina AB3b		MAT1-2	N/A	N/A	N/A
USA	Montana	Hwy 28 at Cottonwood Creek Rd	47.54735°N, 114.68165°W	T. Spribille	UPS	U_064	L. lupina AB3b		MAT1-2	N/A	N/A	N/A
USA	Montana	Hwy 28 at Cottonwood Creek Rd	47.54735°N, 114.68165°W	T. Spribille	UPS	U_065	L. lupina BH4		MAT1-1	MG645027	N/A	N/A
USA	Montana	Hwy 28 at Cottonwood Creek Rd	47.54735°N, 114.68165°W	T. Spribille	UPS	U_066	L. Lupina BH1		MAT1-2	N/A	N/A	N/A
USA	Montana	Hwy 28 at Cottonwood Creek Rd	47.54735°N, 114.68165°W	T. Spribille	UPS	U_067	L. lupina BH4		MAT1-1	N/A	N/A	N/A
USA	Montana	Saddle Mtn	47.15722°N, 114.14395°W	T. Spribille	UPS	U_068	L. lupina BS1a		MAT1-2	N/A	N/A	N/A
USA	Montana	Saddle Mtn	47.15722°N, 114.14395°W	T. Spribille	UPS	U_069	L. cf. columbiana, unique ITS		MAT1-1	MG645048	N/A	N/A
USA	Montana	Saddle Mtn	47.15722°N, 114.14395°W	T. Spribille	UPS	U_070	L. lupina BH9		MAT1-1	N/A	N/A	N/A
USA	Montana	Saddle Mtn	47.15722°N, 114.14395°W	T. Spribille	UPS	U_071	L. barbata CL2		MAT1-1	MG645014	N/A	N/A
USA	Montana	Saddle Mtn	47.15722°N, 114.14395°W	T. Spribille	UPS	U_072	L. cf. columbiana, unique ITS		MAT1-2	MG645043	N/A	N/A
USA	Montana	Saddle Mtn	47.15722°N, 114.14395°W	T. Spribille	UPS	U_073	L. barbata LP1		MAT1-2	MG645015	N/A	N/A
USA	Montana	Saddle Mtn	47.15722°N, 114.14395°W	T. Spribille	UPS	U_074	L. lucida DP2		MAT1-2	N/A	N/A	N/A
USA	Montana	Saddle Mtn	47.15722°N, 114.14395°W	T. Spribille	UPS	U_075	L. lucida DP2		MAT1-1	N/A	N/A	N/A
USA	Montana	Saddle Mtn	47.15722°N, 114.14395°W	T. Spribille	UPS	U_076	L. lupina AB3b		MAT1-2	N/A	N/A	N/A
USA	Montana	Hwy 28 at Cottonwood Creek Rd	47.54735°N, 114.68165°W	T. Spribille	UPS	U_077	L. cf. barbata, unique ITS		MAT1-2	MG645044	N/A	N/A
USA	Montana	Saddle Mtn	47.15722°N, 114.14395°W	T. Spribille	UPS	U_078	L. lupina BS1a		MAT1-1	N/A	N/A	N/A
USA	Montana	Saddle Mtn	47.15722°N, 114.14395°W	T. Spribille	UPS	U_079	L. lupina AB3b		MAT1-2	N/A	N/A	N/A
USA	Montana	Saddle Mtn	47.15722°N, 114.14395°W	T. Spribille	UPS	U_080	L. vulpina PV1a		MAT1-2	N/A	N/A	N/A
USA	Montana	Saddle Mtn	47.15722°N, 114.14395°W	T. Spribille	UPS	U_081	L. lupina AB3b		MAT1-2	N/A	N/A	N/A
USA	Montana	Saddle Mtn	47.15722°N, 114.14395°W	T. Spribille	UPS	U_082	L. lupina AB3b		MAT1-1	N/A	N/A	N/A
USA	Montana	Siegel Creek	47.30980°N, 114.80423°W	T. Spribille	UPS	U_083	L. vulpina CC1a		MAT1-2	MG645034	N/A	N/A
USA	Montana	Siegel Creek	47.30980°N, 114.80423°W	T. Spribille	UPS	U_084	L. Lupina BH1		MAT1-2	N/A	N/A	N/A
USA	Montana	Rock Creek	46.58006°N, 113.66978°W	T. Spribille	UPS	U_085	L. lupina BH12		MAT1-2	N/A	N/A	N/A
USA	Montana	Rock Creek	46.58006°N, 113.66978°W	T. Spribille	UPS	U_086	L. Lupina BH1		MAT1-2	N/A	N/A	N/A
USA	Montana	Rock Creek	46.58006°N, 113.66978°W	T. Spribille	UPS	U_087	L. lupina AB5a		MAT1-1	N/A	N/A	N/A
USA	Montana	Rock Creek	46.58006°N, 113.66978°W	T. Spribille	UPS	U_088	L. lupina BS1a		MAT1-2	N/A	N/A	N/A
USA	Montana	Rock Creek	46.58006°N, 113.66978°W	T. Spribille	UPS	U_089	L. vulpina FP1a		MAT1-1	N/A	N/A	N/A
USA	Montana	Rock Creek	46.58006°N, 113.66978°W	T. Spribille	UPS	U_090	L. Lupina CY5a		MAT1-1	MG645022	N/A	N/A
USA	Montana	Rock Creek	46.58006°N, 113.66978°W	T. Spribille	UPS	U_091	L. lupina AB3b		MAT1-2	N/A	N/A	N/A
USA	Montana	Rock Creek	46.58006°N, 113.66978°W	T. Spribille	UPS	U_092	L. lupina AB3b		MAT1-2	N/A	N/A	N/A
USA	Montana	Rock Creek	46.58006°N, 113.66978°W	T. Spribille	UPS	U_093	L. lupina AB3b		MAT1-1	N/A	N/A	N/A
USA	Montana	Rock Creek	46.58006°N, 113.66978°W	T. Spribille	UPS	U_094	L. Lupina BH1		MAT1-2	N/A	N/A	N/A
USA	Montana	Rock Creek	46.58006°N, 113.66978°W	T. Spribille	UPS	U_095	L. lupina AB3b		MAT1-1	N/A	N/A	N/A
USA	Montana	Rock Creek	46.58006°N, 113.66978°W	T. Spribille	UPS	U_096	L. lupina AB3b		MAT1-1	N/A	N/A	N/A
USA	Montana	Rock Creek	46.58006°N, 113.66978°W	T. Spribille	UPS	U_097	L. lupina BS1a		MAT1-2	N/A	N/A	N/A
USA	Montana	Rock Creek	46.58006°N, 113.66978°W	T. Spribille	UPS	U_098	L. lupina AB3b		MAT1-1	N/A	N/A	N/A
USA	Montana	Siegel Creek	47.30980°N, 114.80423°W	T. Spribille	UPS	U_099	L. lupina AB3b		MAT1-1	N/A	N/A	N/A
USA	Montana	Jocko Prairie	47.20464°N, 113.90652°W	T. Spribille	UPS	U_100	L. lupina AB3b		MAT1-1	N/A	N/A	N/A
USA	Montana	Jocko Prairie	47.20464°N, 113.90652°W	T. Spribille	UPS	U_101	L. Lupina BH1		MAT1-1	N/A	N/A	N/A
USA	Montana	Jocko Prairie	47.20464°N, 113.90652°W	T. Spribille	UPS	U_102	L. lupina AB3b		MAT1-2	N/A	N/A	N/A
USA	Montana	Jocko Prairie	47.20464°N, 113.90652°W	T. Spribille	UPS	U_103	L. lupina AB3b		MAT1-1	N/A	N/A	N/A
USA	Montana	Jocko Prairie	47.20464°N, 113.90652°W	T. Spribille	UPS	U_104	L. lupina AB3b		MAT1-2	N/A	N/A	N/A
USA	Montana	Jocko Prairie	47.20464°N, 113.90652°W	T. Spribille	UPS	U_105	L. lupina AB5a		MAT1-2	N/A	N/A	N/A
USA	Montana	Jocko Prairie	47.20464°N, 113.90652°W	T. Spribille	UPS	U_106	L. lupina AB3b		MAT1-1	N/A	N/A	N/A
USA	Montana	Jocko Prairie	47.20464°N, 113.90652°W	T. Spribille	UPS	U_107	L. lucida DP2		MAT1-1	MG645017	N/A	N/A
USA	Montana	Jocko Prairie	47.20464°N, 113.90652°W	T. Spribille	UPS	U_108	L. cf. columbiana, unique ITS		MAT1-1	MG645045	N/A	N/A
USA	Montana	Jocko Prairie	47.20464°N, 113.90652°W	T. Spribille	UPS	U_109	L. lupina AB3b		MAT1-1	N/A	N/A	N/A
USA	Montana	Jocko Prairie	47.20464°N, 113.90652°W	T. Spribille	UPS	U_110	L. lucida DP2		MAT1-2	N/A	N/A	N/A
USA	Montana	Jocko Prairie	47.20464°N, 113.90652°W	T. Spribille	UPS	U_111	L. lupina AB3b		MAT1-2	N/A	N/A	N/A
USA	Montana	Jocko Prairie	47.20464°N, 113.90652°W	T. Spribille	UPS	U_112	L. lupina BH4		MAT1-1	N/A	N/A	N/A
USA	Montana	Jocko Prairie	47.20464°N, 113.90652°W	T. Spribille	UPS	U_113	L. lupina AB3b		MAT1-2	N/A	N/A	N/A
USA	Montana	Jocko Prairie	47.20464°N, 113.90652°W	T. Spribille	UPS	U_114	L. vulpina PV1a		MAT1-1	N/A	N/A	N/A
USA	Montana	Jocko Prairie	47.20464°N, 113.90652°W	T. Spribille	UPS	U_115	L. Lupina BH1		MAT1-2	N/A	N/A	N/A
USA	Montana	Jocko Prairie	47.20464°N, 113.90652°W	T. Spribille	UPS	U_116	L. lupina BH11		MAT1-2	MG645028	N/A	N/A
USA	Montana	Jocko Prairie	47.20464°N, 113.90652°W	T. Spribille	UPS	U_117	L. cf. columbiana, unique ITS		MAT1-1	N/A	N/A	N/A
USA	Montana	Jocko Prairie	47.20464°N, 113.90652°W	T. Spribille	UPS	U_118	L. lucida DP2		MAT1-2	N/A	N/A	N/A
USA	Montana	Jocko Prairie	47.20464°N, 113.90652°W	T. Spribille	UPS	U_119	L. lupina AB3b	fertile	MAT1-1	N/A	N/A	N/A
USA	Montana	Jocko Prairie	47.20464°N, 113.90652°W	T. Spribille	UPS	U_120	L. barbata		MAT1-1	N/A	N/A	N/A
USA	Montana	Jocko Prairie	47.20464°N, 113.90652°W	T. Spribille	UPS	U_122	L. lucida DP2		MAT1-1	N/A	N/A	N/A
USA	Montana	Jocko Prairie	47.20464°N, 113.90652°W	T. Spribille	UPS	U_123	L. cf. columbiana, unique ITS		MAT1-1	MG645046	N/A	N/A
USA	Montana	Jocko Prairie	47.20464°N, 113.90652°W	T. Spribille	UPS	U_124	L. cf. rugosa, unique ITS		MAT1-1	MG645047	N/A	N/A
USA	Washington	Washington, Kittitas County, Ensign Ranch	47°12.767'N, 121° 5.591'W	S., H., J., & G. Leavitt NO13-WA-090	UPS	U_125	L. barbata, unique ITS		MAT1-1	MG645029	N/A	N/A
USA	Washington	Washington,Kittitas County, Ensign Ranch	47°12.767'N, 121° 5.591'W	S., H., J., & G. Leavitt NO13-WA-090	UPS	U_126	L. vulpina FP1a		MAT1-1	N/A	N/A	N/A
USA	Washington	Washington, Kittitas County, Ensign Ranch	47°12.767'N, 121° 5.591'W	S., H., J., & G. Leavitt NO13-WA-090	UPS	U_127	L. rugosa CL1		MAT1-2	N/A	N/A	N/A
USA	Washington	Washington, Kittitas County, along I-90	47°9.651'N, 120° 51.035'W	S. S., H., J., & G.Leavitt NO13-WA-101	UPS	U_128	L. rugosa CL1		MAT1-2	N/A	N/A	N/A
USA	Oregon	Summit Lake, near crest of Cascade Range	43.44462°N 122.08038°W	B. Mc Cune 34563	UPS	U_129	L. cf. gracilis BH1		MAT1-2	N/A	N/A	N/A
USA	Oregon	Summit Lake, near crest of Cascade Range	43.44462°N 122.08038°W	B. Mc Cune 34563	UPS	U_130	L. cf. gracilis BH12		MAT1-2	N/A	N/A	N/A
USA	Oregon	Summit Lake, near crest of Cascade Range	43.44462°N 122.08038°W	B. Mc Cune 34563	UPS	U_143	L. cf. gracilis CC1b		MAT1-2	N/A	N/A	N/A
USA	Oregon	Summit Lake, near crest of Cascade Range	43.44462°N 122.08038°W	B. Mc Cune 34563	UPS	U_144	L. cf. gracilis FP1a		MAT1-2	N/A	N/A	N/A
USA	Oregon	Summit Lake, near crest of Cascade Range	43.44462°N 122.08038°W	B. Mc Cune 34563	UPS	U_145	L. cf. gracilis PV1a		MAT1-2	N/A	N/A	N/A
USA	Oregon	Summit Lake, near crest of Cascade Range	43.44462°N 122.08038°W	B. Mc Cune 34563	UPS	U_146	L. cf. gracilis, unique ITS		MAT1-2	N/A	N/A	N/A
USA	Oregon	Summit Lake, near crest of Cascade Range	43.44462°N 122.08038°W	B. Mc Cune 34563	UPS	U_147	L. cf. gracilis PV1a		MAT1-2	N/A	N/A	N/A
USA	Oregon	Summit Lake, near crest of Cascade Range	43.44462°N 122.08038°W	B. Mc Cune 34563	UPS	U_148	L. cf. gracilis FP1a		MAT1-2	N/A	N/A	N/A
USA	Montana	Saddle Mtn	47.15722°N, 114.14395°W	T. Spribille	UPS	U_149	L. lupina AB3b	fertile	MAT1-2	N/A	N/A	N/A
USA	Montana	Saddle Mtn	47.15722°N, 114.14395°W	T. Spribille	UPS	U_150	L. lucida DP2		MAT1-1	N/A	N/A	N/A
USA	Montana	Saddle Mtn	47.15722°N, 114.14395°W	T. Spribille	UPS	U_151	L. cf. columbiana, unique ITS		MAT1-1	MG645049	N/A	N/A
USA	Montana	Saddle Mtn	47.15722°N, 114.14395°W	T. Spribille	UPS	U_152	L. cf. columbiana, unique ITS		MAT1-2	MG645050	N/A	N/A
USA	Montana	Saddle Mtn	47.15722°N, 114.14395°W	T. Spribille	UPS	U_153	L. cf. columbiana, unique ITS		MAT1-1	MG645051	N/A	N/A
USA	Montana	Saddle Mtn	47.15722°N, 114.14395°W	T. Spribille	UPS	U_154	L. cf. columbiana, unique ITS		MAT1-1	MG645052	N/A	N/A
